# Supplementary material for: BioSCOOP – Biobank Sample Communication Protocol. New approach for the transfer of information between biobanks
Source: Database (Oxford). 2019 Oct 11;2019:baz105. doi: 10.1093/database/baz105 (PMC6791335; doi:10.1093/database/baz105)
Supplement: Tab_S1_baz105 [file tab_s1_baz105.xlsx]

## Sheet: Arkusz1
	Attribute	Data type	Description	Standard (Standard IEEE754)
	1. PHENOTYPIC
Main	Collection ID	string	Collection name according to MIABIS 2.0	MIABIS 2.0
	Donor ID	integer	Numeric code specific to particular sample-donor that also links the sample collection (MIABIS 2.0) to the hosting biobank or study	ISO1366 alpha2
	Ethnic group/ancestry	string	Ethnic identity of sample donor	MIABIS 2.0
	Skin tone	integer	Skin tone described with the use of scales	CIELAB scales
	Hair colour	integer	Hair colour described in scales	CIELAB, Fischer
	Blood group	string	Blood group based on scales including Rh factor	AB0, Kell, Levis scales
	Eye colour	integer	Eye colour described in scale	Michalski, Martin-Saller
Indexes	WHR	number	Waist hip ratio
	BMI	number	Body mass index
	CI	number	Corpulence index (Rohrer's index)
	sex	enum	sex of the donor
Body segments	2. ANTHROPOLOGICAL
Head	Maximum head lenght	number	Distance from the most prominent point in the mid-sagittal plane between eyebrows (glabella) to the point of the most backward projection of the head, in the mid-plane (g-op)	ISO 7250-1:2017
	Head breadth	number	The greatest transverse diameter of the head, measured perpendicularly to the g-op lenght (usually on the parietal bones)	ISO 7250-1:2017 i inn
	Morphological face height	number	Distance between nasion and gnathion points (n-gn)	ISO 7250-1:2017
	Face maximal breadth	number	Distance between the most lateral points on zygomatic arches (zy-zy)	ISO 7250-1:2017
	Head circumference	number	Maximum, approximately horizontal, circumference of head passing through galbella in front and occipital protuberance in behind	ISO 7250-1:2017
	Neck circumference	number	Circumference of neck just below the bulge at the thyroid cartilage, perpendicular to the long axis of the neck	ISO 7250-1:2017
Body	Weight declarative	number	Total body mass given in kilograms (accuracy to 100 g)	ISO 7250-1:2017
	Weight measured	number	Total body mass given in kilograms (accuracy to 100 g)	ISO 7250-1:2017
	Stature declarative	number	Total body height given in centimeters (accuracy to 0,5 cm)	ISO 7250-1:2017
	Stature measured	number	Vertical distance from Basis to vertex (distance from the highest point of the top of the head, in the median plane, to the floor)	ISO 7250-1:2017
	Eye height	number	Vertical distance from the floor (Basis) to the outer corner of the eye (ectocanthus)	ISO 7250-1:2017
	Shoulder height	number	Vertical distance from the floor (Basis) to the acromion (B-a)	ISO 7250-1:2017
	Dactylion height	number	Vertical distance from the floor (Basis) to the tip of the third finger (daIII) in erect standing
	Suprasternale height	number	The distance of the lowest point of the suprasternal notch from the floor (Basis)
	Lower limb lenght (1)	number	Height of the point trochanterion (B-tro)	ISO 7250-1:2017
	Lower limb lenght (2)	number	Height of the symphysion (B-sy)
	Tibiale height	number	Vertical distance from the floor (Basis) to the tibiale (the highest point of the medial edge of tibia)	ISO 7250-1:2017
	Sitting height (erect)	number	Vertical distance from a horizontal sitting surface to the highest point of the head (vertex)	ISO 7250-1:2017
	Shoulder height (erect)	number	Vertical distance from a horizontal sitting surface to the acromion	ISO 7250-1:2017
	Knee height	number	Vertical distance from the floor (basis) to the highest point of the superior border of the patella (suprapatella, sitting)	ISO 7250-1:2017
	Chest circumference	number	Chest circumference measured through xiphoidale (xi) point	ISO 7250-1:2017
	Waist circumference	number	Horizontal circumference of the waist at level midway between the lowest ribs and the upper iliac crest (point zl)	ISO 7250-1:2017
Hand	Hand lenght	number	The distance from the tip of the middle finger, along its long axis, to a line connecting the radial and ulnar styloid processes (sty-daIII)	ISO 7250-1:2017
	Hand breadth	number	Maximum breadth of the hand measured between the heads of the second and the fifth metacarpal bones (mr-mu)	ISO 7250-1:2017
Foot	Foot length	number	Maximum distance from rear of the heel to tip of the longest toe, measured parallel to the longitudinal axis of the foot (pte-ap)	ISO 7250-1:2017
	Foot breadth	number	Maximum breadth of the foot at the level of metatarsophalangeal joints (mtt-mtf)	ISO 7250-1:2017
	3. DISEASES AND MEDICAL DATA
	ICD-10	string with the pattern	International Statistical Classification of Diseases and Related Health Problems
	SNOMED	integer	collection of medical terms
	ICD-9	string with the pattern	A international classification system for surgical, diagnostic and therapeutic procedures
	4. SAMPLE
	Sample material	string	Detailed information about the type of sample material e.g. tissue, blood, feces according to MIABIS 2.0	MIABIS 2.0
	Sample type	string	Material type of donor sample in accordance to MIABIS-2.0-14	MIABIS 2.0
	Sample Info	string	Information about the sample including sample ID, parent sample ID, accession in connection with donor ID, collection, biobank etc. according to MIABIS 2.0	MIABIS 2.0
	Sample QMS	string	Information about the transport and storage conditions based on MIABIS-2.0-15 and SPREC	MIABIS 2.0, SPREC
